# Supplementary material
Source: HighWire-hosted journal article supplement (https://jech.bmj.com/content/77/7/474)
Supplement: inline-supplementary-material-1 [file inline-supplementary-material-1.pdf]

## SUPPLEMENTARY MATERIAL

**Table S1.** Restricted mean survival time (RMST) analyses on the influence of chronic diseases on entering paid employment during a 10-year follow-up among persons who were initially unemployed, stratified by education (extended table). **Bold:** estimate is statistically significant.

|                         | RMST chronic disease         |                                      | RMST no chronic disease      |                                      | RMST chronic disease vs. no chronic disease                   |                                                                          |
|-------------------------|------------------------------|--------------------------------------|------------------------------|--------------------------------------|---------------------------------------------------------------|--------------------------------------------------------------------------|
|                         | Entering paid employment (%) | Months until paid employment (95%CI) | Entering paid employment (%) | Months until paid employment (95%CI) | Unadjusted difference in months until paid employment (95%CI) | Adjusted difference in months until paid employment (95%CI) <sup>a</sup> |
| Cardiovascular diseases | 15.6%                        | <b>101.76</b> (101.47–102.06)        | 32.8%                        | <b>84.68</b> (84.54–84.81)           | <b>17.09</b> (16.76–17.41)                                    | <b>10.37</b> (9.98–10.77)                                                |
| Low education           | 11.7%                        | <b>107.43</b> (107.06–107.79)        | 26.6%                        | <b>93.44</b> (93.25–93.62)           | <b>13.99</b> (13.58–14.39)                                    | <b>9.74</b> (9.23–10.25)                                                 |
| Intermediate education  | 30.7%                        | <b>83.59</b> (82.78–84.39)           | 52.1%                        | <b>63.67</b> (63.40–63.95)           | <b>19.91</b> (19.06–20.77)                                    | <b>16.42<sup>b</sup></b> (15.47–17.37)                                   |
| High education          | 34.4%                        | <b>78.47</b> (77.14–79.79)           | 60.4%                        | <b>51.91</b> (51.49–52.33)           | <b>26.56</b> (25.17–27.94)                                    | <b>19.30<sup>b</sup></b> (17.84–20.76)                                   |
| Inflammatory conditions | 12.3%                        | <b>98.53</b> (98.13–98.92)           | 23.3%                        | <b>87.53</b> (87.38–87.69)           | <b>11.00</b> (10.57–11.42)                                    | <b>2.50</b> (1.97–3.03)                                                  |
| Low education           | 9.5%                         | <b>103.93</b> (103.46–104.39)        | 16.5%                        | <b>95.75</b> (95.53–95.97)           | <b>8.18</b> (7.66–8.70)                                       | <b>3.27</b> (2.56–3.99)                                                  |
| Intermediate education  | 22.7%                        | <b>77.86</b> (76.80–78.92)           | 38.0%                        | <b>66.40</b> (66.07–66.72)           | <b>11.46</b> (10.35–12.57)                                    | <b>3.17</b> (1.71–4.63)                                                  |
| High education          | 23.0%                        | <b>77.24</b> (75.20–79.28)           | 49.9%                        | <b>53.81</b> (53.35–54.27)           | <b>23.43</b> (21.34–25.53)                                    | <b>4.48</b> (1.97–6.98)                                                  |
| Diabetes                | 14.7%                        | <b>104.32</b> (103.89–104.75)        | 34.1%                        | <b>86.26</b> (86.13–86.38)           | <b>18.06</b> (17.62–18.51)                                    | <b>7.96</b> (7.45–8.48)                                                  |
| Low education           | 11.2%                        | <b>109.13</b> (108.63–109.63)        | 27.9%                        | <b>94.96</b> (94.80–95.13)           | <b>14.17</b> (13.64–14.69)                                    | <b>7.35</b> (6.70–7.99)                                                  |
| Intermediate education  | 33.7%                        | <b>83.43</b> (82.08–84.78)           | 54.4%                        | <b>65.64</b> (65.38–65.90)           | <b>17.79</b> (16.41–19.17)                                    | <b>13.54<sup>b</sup></b> (12.03–15.05)                                   |
| High education          | 36.0%                        | <b>80.06</b> (77.77–82.36)           | 61.9%                        | <b>54.45</b> (54.05–54.84)           | <b>25.62</b> (23.29–27.95)                                    | <b>19.21<sup>b</sup></b> (16.86–21.57)                                   |
| Respiratory illness     | 17.0%                        | <b>99.10</b> (98.68–99.52)           | 31.9%                        | <b>86.21</b> (86.08–86.34)           | <b>12.89</b> (12.45–13.33)                                    | <b>3.98</b> (3.55–4.42)                                                  |
| Low education           | 12.4%                        | <b>105.85</b> (105.35–106.35)        | 25.7%                        | <b>94.72</b> (94.55–94.90)           | <b>11.12</b> (10.60–11.65)                                    | <b>4.13</b> (3.53–4.72)                                                  |
| Intermediate education  | 33.7%                        | <b>77.31</b> (76.19–78.42)           | 51.1%                        | <b>65.46</b> (65.19–65.74)           | <b>11.84</b> (10.70–12.99)                                    | <b>5.94<sup>b</sup></b> (4.71–7.17)                                      |
| High education          | 41.3%                        | <b>66.82</b> (64.85–68.79)           | 59.2%                        | <b>54.64</b> (54.23–55.05)           | <b>12.18</b> (10.17–14.19)                                    | <b>6.88<sup>b</sup></b> (4.83–8.92)                                      |
| Common mental disorders | 12.5%                        | <b>105.71</b> (105.45–105.98)        | 32.0%                        | <b>83.49</b> (83.35–83.63)           | <b>22.22</b> (21.92–22.53)                                    | <b>7.33</b> (7.00–7.66)                                                  |
| Low education           | 9.5%                         | <b>109.78</b> (109.45–110.12)        | 25.2%                        | <b>92.63</b> (92.44–92.83)           | <b>17.15</b> (16.76–17.54)                                    | <b>6.04</b> (5.61–6.47)                                                  |
| Intermediate education  | 23.4%                        | <b>91.61</b> (90.87–92.36)           | 51.4%                        | <b>61.38</b> (61.09–61.66)           | <b>30.24</b> (29.44–31.03)                                    | <b>14.02<sup>b</sup></b> (13.20–14.84)                                   |
| High education          | 28.8%                        | <b>84.89</b> (83.60–86.17)           | 60.3%                        | <b>50.63</b> (50.20–51.05)           | <b>34.26</b> (32.91–35.61)                                    | <b>15.91<sup>b</sup></b> (14.57–17.26)                                   |
| Psychotic disorders     | 7.7%                         | <b>112.46</b> (112.16–112.75)        | 34.0%                        | <b>85.09</b> (84.96–85.22)           | <b>27.37</b> (27.05–27.69)                                    | <b>9.28</b> (8.88–9.68)                                                  |
| Low education           | 7.8%                         | <b>112.42</b> (111.96–112.89)        | 27.2%                        | <b>94.51</b> (94.34–94.68)           | <b>17.91</b> (17.42–18.41)                                    | <b>6.65</b> (6.10–7.20)                                                  |
| Intermediate education  | 14.6%                        | <b>104.86</b> (103.96–105.76)        | 54.5%                        | <b>63.67</b> (63.40–63.93)           | <b>41.19</b> (40.25–42.13)                                    | <b>19.62<sup>b</sup></b> (18.60–20.64)                                   |
| High education          | 17.0%                        | <b>102.60</b> (101.05–104.15)        | 62.3%                        | <b>52.68</b> (52.29–53.08)           | <b>49.92</b> (48.32–51.52)                                    | <b>26.03<sup>b</sup></b> (24.35–27.72)                                   |

<sup>a</sup> Models are adjusted for age, gender, living with a partner, having children, migration background, educational attainment, number of months in paid employment before baseline, and the presence of an additional chronic disease at baseline.

<sup>b</sup> Difference in RMST between persons with and without chronic diseases was statistically significantly different among persons with intermediate or high education compared to persons with low education at the 0.05 level.

**Table S2.** Restricted mean survival time (RMST) analyses on the influence of chronic diseases on obtaining a permanent contract during a 10-year follow-up among persons who entered paid employment, stratified by education (extended table). **Bold:** estimate is statistically significant.

|                         | RMST chronic disease               |                                         | RMST no chronic disease            |                                         | RMST chronic disease vs. no chronic disease                      |                                                                             |
|-------------------------|------------------------------------|-----------------------------------------|------------------------------------|-----------------------------------------|------------------------------------------------------------------|-----------------------------------------------------------------------------|
|                         | Obtaining a permanent contract (%) | Months until permanent contract (95%CI) | Obtaining a permanent contract (%) | Months until permanent contract (95%CI) | Unadjusted difference in months until permanent contract (95%CI) | Adjusted difference in months until permanent contract (95%CI) <sup>a</sup> |
| Cardiovascular diseases | 42.3%                              | <b>53.91</b> (52.74–55.08)              | 40.3%                              | <b>55.88</b> (55.58–56.19)              | <b>-1.98</b> (-3.19– -0.76)                                      | <b>4.42</b> (1.85–6.99)                                                     |
| Low education           | 43.6%                              | <b>49.19</b> (47.26–51.12)              | 39.2%                              | <b>52.05</b> (51.49–52.61)              | <b>-2.86</b> (-4.87– -0.85)                                      | <b>6.69</b> (1.01–12.36)                                                    |
| Intermediate education  | 40.6%                              | <b>55.16</b> (53.31–57.01)              | 39.9%                              | <b>55.29</b> (54.81–55.77)              | -0.13 (-2.04–1.79)                                               | <b>6.89</b> (1.25–12.54)                                                    |
| High education          | 36.5%                              | <b>64.33</b> (61.56–67.09)              | 42.3%                              | <b>60.79</b> (60.16–61.41)              | <b>3.54</b> (0.71–6.38)                                          | -5.20 <sup>b</sup> (-13.32–2.92)                                            |
| Inflammatory conditions | 33.6%                              | <b>57.63</b> (55.82–59.44)              | 37.1%                              | <b>57.54</b> (57.14–57.95)              | 0.08 (-1.77–1.94)                                                | <b>4.80</b> (2.02–7.59)                                                     |
| Low education           | 35.6%                              | <b>54.73</b> (52.01–57.44)              | 36.3%                              | <b>53.99</b> (53.18–54.81)              | 0.74 (-2.10–3.57)                                                | 6.15 (-1.54–13.85)                                                          |
| Intermediate education  | 30.5%                              | <b>59.63</b> (56.68–62.58)              | 36.0%                              | <b>56.92</b> (56.28–57.56)              | 2.71 (-0.31–5.73)                                                | 3.29 (-4.64–11.23)                                                          |
| High education          | 30.5%                              | <b>60.88</b> (55.66–66.09)              | 38.4%                              | <b>61.30</b> (60.56–62.04)              | -0.42 (-5.69–4.85)                                               | -2.73 (-19.47–14.01)                                                        |
| Diabetes                | 41.3%                              | <b>53.79</b> (51.84–55.75)              | 41.5%                              | <b>55.27</b> (54.99–55.55)              | -1.47 (-3.45–0.50)                                               | <b>8.32</b> (4.26–12.37)                                                    |
| Low education           | 42.7%                              | <b>49.75</b> (46.72–52.78)              | 40.3%                              | <b>51.24</b> (50.74–51.74)              | -1.50 (-4.57–1.58)                                               | 9.57 (-0.17–19.31)                                                          |
| Intermediate education  | 38.9%                              | <b>55.16</b> (52.00–58.32)              | 41.1%                              | <b>54.84</b> (54.40–55.28)              | 0.32 (-2.87–3.51)                                                | 8.12 (-2.36–18.61)                                                          |
| High education          | 36.1%                              | <b>64.79</b> (59.85–69.73)              | 43.3%                              | <b>60.48</b> (59.90–61.07)              | 4.31 (-0.66–9.28)                                                | 3.93 (-12.10–19.96)                                                         |
| Respiratory illness     | 40.4%                              | <b>53.72</b> (52.19–55.26)              | 40.7%                              | <b>55.69</b> (55.39–55.99)              | <b>-1.97</b> (-3.53– -0.40)                                      | 1.26 (-0.91–3.43)                                                           |
| Low education           | 41.2%                              | <b>49.63</b> (47.04–52.22)              | 39.8%                              | <b>51.76</b> (51.22–52.30)              | -2.13 (-4.77–0.52)                                               | 3.94 (-3.01–10.89)                                                          |
| Intermediate education  | 38.6%                              | <b>53.10</b> (50.69–55.52)              | 40.2%                              | <b>55.39</b> (54.92–55.86)              | -2.29 (-4.75–0.18)                                               | -5.27 (-10.73–0.18)                                                         |
| High education          | 39.7%                              | <b>61.42</b> (58.03–64.81)              | 42.3%                              | <b>60.64</b> (60.02–61.25)              | 0.78 (-2.66–4.23)                                                | 5.17 (-5.76–16.09)                                                          |
| Common mental disorders | 40.4%                              | <b>51.35</b> (49.98–52.73)              | 41.3%                              | <b>56.02</b> (55.71–56.33)              | <b>-4.67</b> (-6.07– -3.26)                                      | 1.91 (-0.05–3.88)                                                           |
| Low education           | 40.6%                              | <b>47.63</b> (45.26–50.00)              | 40.3%                              | <b>52.20</b> (51.64–52.75)              | <b>-4.57</b> (-7.00– -2.13)                                      | 3.11 (-2.90–9.12)                                                           |
| Intermediate education  | 39.3%                              | <b>51.49</b> (49.35–53.63)              | 40.7%                              | <b>55.72</b> (55.25–56.20)              | <b>-4.24</b> (-6.43– -2.04)                                      | 0.78 (-4.69–6.26)                                                           |
| High education          | 36.9%                              | <b>59.64</b> (56.56–62.73)              | 43.0%                              | <b>60.70</b> (60.09–61.32)              | -1.06 (-4.21–2.09)                                               | 4.22 (-4.82–13.25)                                                          |
| Psychotic disorders     | 46.9%                              | <b>39.00</b> (36.88–41.13)              | 41.6%                              | <b>55.57</b> (55.28–55.85)              | <b>-16.56</b> (-18.71– -14.42)                                   | <b>-7.04</b> (-9.94– -4.14)                                                 |
| Low education           | 46.7%                              | <b>37.20</b> (33.85–40.56)              | 40.6%                              | <b>51.16</b> (50.67–51.65)              | <b>-13.96</b> (-17.35– -10.57)                                   | <b>-9.91</b> (-13.94– -5.89)                                                |
| Intermediate education  | 43.0%                              | <b>40.08</b> (36.63–43.53)              | 41.2%                              | <b>55.15</b> (54.71–55.59)              | <b>-15.08</b> (-18.56– -11.60)                                   | 2.58 <sup>b</sup> (-4.63–9.80)                                              |
| High education          | 39.2%                              | <b>49.30</b> (43.79–54.81)              | 43.3%                              | <b>59.79</b> (59.22–60.36)              | <b>-10.49</b> (-16.03– -4.95)                                    | <b>-15.19</b> (-22.29– -8.09)                                               |

<sup>a</sup> Models are adjusted for age, gender, living with a partner, having children, migration background, educational attainment, number of months in paid employment before baseline, and the presence of an additional chronic disease at baseline.

<sup>b</sup> Difference in RMST between persons with and without chronic diseases was statistically significantly different among persons with intermediate or high education compared to persons with low education at the 0.05 level.
